# Supplementary material for: Optimized fractionated radiotherapy with anti-PD-L1 and anti-TIGIT: a promising new combination
Source: J Immunother Cancer. 2019 Jun 25;7:160. doi: 10.1186/s40425-019-0634-9 (PMC6593525; doi:10.1186/s40425-019-0634-9)
Supplement: Supplementary file 1 — Table S1. List of antibodies used for identification of myeloid and lymphoid cell and for the study of lymphoid function. (XLSX 13 kb) [file 40425_2019_634_MOESM1_ESM.xlsx]

## Sheet: Table panel
		Marker	Fluorochrome	Clone
	Myeloid panel	Ly-6C	VioBlue	1G7.G10
		CD11b	VioGreen	REA592
		Ly-6G	Brilliant Violet 785	1A8
		pan-MHC-II	Alexa Fluor 488	M5/114.15.2
		PD-L1	PE	MIH7
		CD206	PE-Dazzle594	C068C2
		F4/80	PerCP-Vio700	REA126
		Galectin-9	PE-Vio770	RG9-35.7
		CD45	APC	REA737
		Fixable Viability Dye	eFluor 780	x
		Marker	Fluorochrome	Clone
	Lymphoid panel	CD4	VioGreen	REA604
		FoxP3	Vio515	REA788
		CD8α	PE-Vio615	REA601
		CD25	PE-Vio770	REA568
		CD45	APC	REA737
		CD3ε	Alexa 700	17A2
		Fixable Viability Dye	eFluor 780	x
		Marker	Fluorochrome	Clone
	Function panel	CD4	VioGreen	REA604
		TNF-α	Vio515	REA636
		CD8α	PE-Vio615	REA601
		IFNγ	PE-Cy7	XMG1.2
		CD45	APC	REA737
		CD3ε	Alexa 700	17A2
		Fixable Viability Dye	eFluor 780	x
	Supplementary Table X List of antibodies used for identification of myeloid and lymphoid cell and for the study of lymphoid function

## Sheet: Feuil1
		Marker	Fluorochrome	Clone
	Myeloid panel	Ly-6C	VioBlue	1G7.G10
		CD11b	VioGreen	REA592
		Ly-6G	Brilliant Violet 785	1A8
		pan-MHC-II	Alexa Fluor 488	M5/114.15.2
		PD-L1	PE	MIH7
		CD206	PE-Dazzle594	C068C2
		F4/80	PerCP-Vio700	REA126
		CD45	APC	REA737
		Fixable Viability Dye	eFluor 780	x
		Marker	Fluorochrome	Clone
	Lymphoid panel	CD4	VioGreen	REA604
		CD8	BV605	53-6.7
		Foxp3	vio BRIGHT 515	REA788
		CD25	PE-Vio770	REA568
		TIGIT	PE-Dazzle 594	1G9
		CD45	APC	REA737
		CD3	A700	17A2
		Fixable Viability Dye	eFluor 780	-
		Marker	Fluorochrome	Clone
	Function panel	CD4	VioGreen	REA604
		CD8	BV605	53-6.7
		Granz B	PE	REA226
		CD45	APC	REA737
		CD3ε	Alexa 700	17A2
		Fixable Viability Dye	eFluor 780	x
	Supplementary Table 1 List of antibodies used for identification of myeloid and lymphoid cell and for the study of lymphoid function
